# Supplementary material for: Facile synthesis of MgFe2O4/C composites as anode materials for lithium-ion batteries with excellent cycling and rate performance
Source: Royal Society of Chemistry journal article supplement (doi:10.1039/c6nj00084c), 2016-01-01
Supplement: c6nj00084c1.pdf [file c6nj00084c1.pdf]

## Electronic Supplementary Information (ESI) for New Journal of Chemistry

### Facile synthesis of MgFe<sub>2</sub>O<sub>4</sub>/C composites as anode materials for lithium-ion batteries with excellent cycling and rate performance

Ningning Huo<sup>a, b, c, 1</sup>, Yanhong Yin<sup>a, b, c, 1, \*</sup>, Wenfeng Liu<sup>a, b, c</sup>, Jun Zhang<sup>a, b, c</sup>, Yanmin Ding<sup>a, b, c</sup>, Qiuxian Wang<sup>a, b, c</sup>, Zhenpu Shi<sup>a, b, c</sup>, Shuting Yang<sup>a, b, c, \*</sup>

<sup>a</sup> National & Local Joint Engineering Laboratory for Motive Power and Key Materials

<sup>b</sup> School of Chemistry and Chemical Engineering, Henan Normal University,  
Xinxiang Henan 453007, P. R. China

<sup>c</sup> Collaborative Innovation Center of Henan Province for Motive Power and Key  
Materials, Henan Normal University, Xinxiang Henan 453007, P. R. China

Corresponding Author

\*E-mail: shutingyang@foxmail.com. Tel: (+86)-373-3326439.

Fax: (+86)-373-3326439.

Electronic supplementary information (ESI) available: additional scheme illustrations.

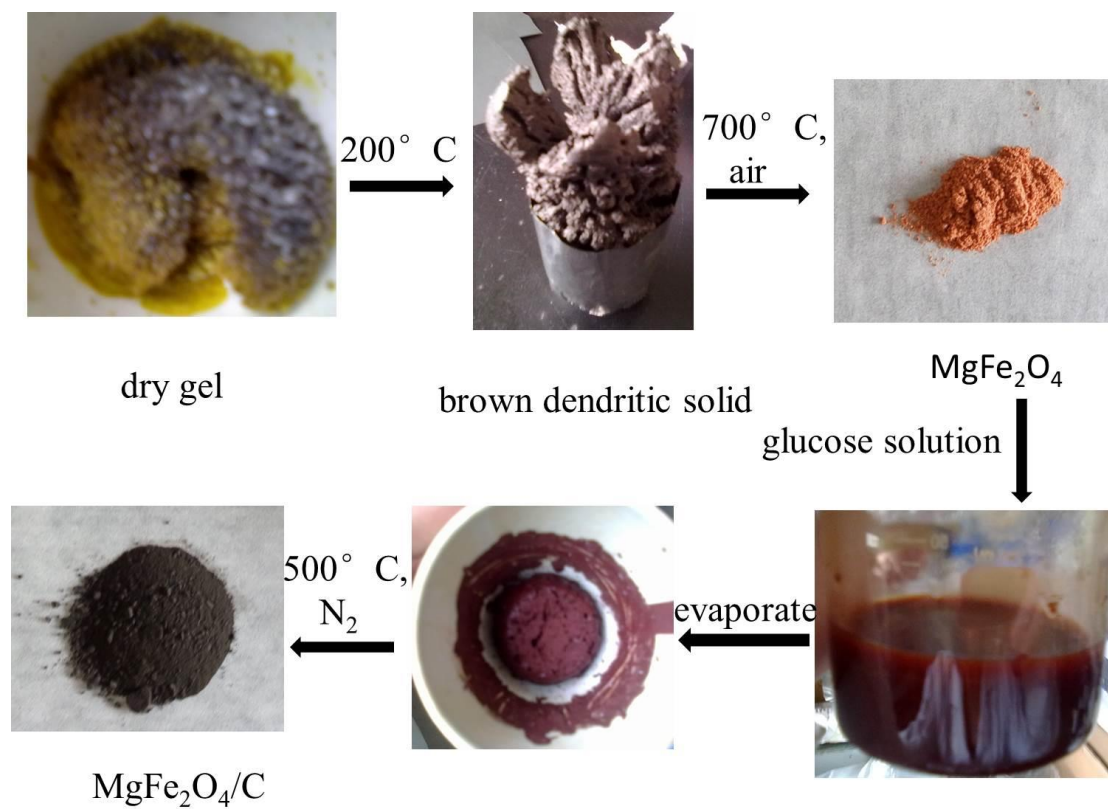

**Scheme S1.** Schematic illustrations of the synthetic procedure
